# Supplementary material
Source: publisher site journal article supplement (https://www.dovepress.com/article/424724)
Supplement: Supplementary file 1 [file get_supplementary_file.php]

**Supplemental Table 1. Characteristics between the patients categorized by week-1 level of absolute lymphocyte count in the primary cohort and propensity score-matched cohort**

|                                               | Before PSM                 |                      |         | 1:1 PSM                    |                      |         |
|-----------------------------------------------|----------------------------|----------------------|---------|----------------------------|----------------------|---------|
|                                               | ALC $\geq$ 1500<br>n=3,523 | ALC< 1500<br>n=2,199 | p value | ALC $\geq$ 1500<br>n=1,958 | ALC< 1500<br>n=1,958 | p value |
| <b>Basic characteristics</b>                  |                            |                      |         |                            |                      |         |
| Age, years                                    | 67 [55–78]                 | 70 [59–81]           | <0.01   | 70 [59–81]                 | 70 [59–81]           | 0.81    |
| Sex (male)                                    | 2217 (62.9%)               | 1416 (64.4%)         | <0.01   | 1441 (64.7%)               | 1416 (64.4%)         | 0.81    |
| Body mass index                               | 23.7 [20.8–                | 22.5 [19.9–25.4]     | <0.01   | 23.0 [19.9–25.5]           | 22.0 [19.9–25.4]     | 0.36    |
| CCI $\geq$ 2                                  | 2208 (62.7%)               | 1552 (70.6%)         | <0.01   | 1587 (71.3%)               | 1552 (70.6%)         | 0.60    |
| <b>Severity and managements</b>               |                            |                      |         |                            |                      |         |
| APACHE II                                     | 24 [18–29]                 | 26 [20–31]           | <0.01   | 26 [20–31]                 | 26 [20–31]           | 0.31    |
| Presence of septic shock                      | 539 (15.3%)                | 447 (20.3%)          | <0.01   | 477 (21.4%)                | 447 (20.3%)          | 0.40    |
| Receiving mechanical ventilation              | 2557 (72.6%)               | 1677 (76.3%)         | <0.01   | 1710 (76.8%)               | 1677 (76.3%)         | 0.66    |
| Fluid balance day 1-3, positive               | 2189 (62.1%)               | 1495 (68.0%)         | <0.01   | 1540 (69.2%)               | 1495 (68.0%)         | 0.38    |
| Blood transfusion in ICU                      | 1615 (45.8%)               | 1329 (60.4%)         | <0.01   | 1385 (62.2%)               | 1329 (60.4%)         | 0.21    |
| <b>Main organ dysfunction/failure</b>         |                            |                      |         |                            |                      |         |
| Acute respiratory failure                     | 1057 (30.0%)               | 542 (24.6%)          | <0.01   | 536 (24.1%)                | 542 (24.6%)          | 0.63    |
| Acute neurological disorders                  | 415 (11.8%)                | 129 (5.9%)           | <0.01   | 128 (5.7%)                 | 129 (5.9%)           | 0.83    |
| Acute cardiac disorders                       | 324 (9.2%)                 | 176 (8.0%)           | 0.13    | 172 (7.7%)                 | 176 (8.0%)           | 0.73    |
| Acute renal disorders                         | 148 (4.2%)                 | 71 (3.2%)            | 0.07    | 71 (3.2%)                  | 71 (3.2%)            | 0.91    |
| <b>Laboratory data</b>                        |                            |                      |         |                            |                      |         |
| White blood cell count ( $10^3/\mu\text{L}$ ) | 13.9 [10.7–16.8]           | 12.5 [9.3–15.8]      | <0.01   | 12.0 [9.5–15.6]            | 13.0 [9.3–15.8]      | 0.74    |
| Albumin(g/dl)                                 | 3.2 [2.7–3.7]              | 3.0 [2.6–3.4]        | <0.01   | 3.0 [2.5–3.4]              | 3.0 [2.6–3.4]        | 0.33    |
| Platelet ( $10^3/\mu\text{L}$ )               | 252 [206–307]              | 242 [197–297]        | <0.01   | 241 [197–296]              | 242 [197–297]        | 0.93    |
| Haemoglobin (g/dL)                            | 12.8 [11.3–14.4]           | 12.3 [11.0–13.7]     | <0.01   | 12.0 [11.0–13.7]           | 12.0 [11.0–13.7]     | 0.41    |
| Lactate (mg/dL)                               | 15.1 [11.4–19.4]           | 15.3 [11.3–19.7]     | 0.59    | 15.0 [11.5–19.4]           | 15.0 [11.3–19.7]     | 0.91    |
| Creatinine (mg/dL)                            | 1.1 [0.8–1.4]              | 1.1 [0.8–1.4]        | 0.37    | 1.0 [0.8–1.4]              | 1.0 [0.8–1.4]        | 0.62    |

Abbreviations: PSM, propensity score matching; CCI, Charlson Comorbidity Index; APACHE, acute physiology and chronic health evaluation.

**Supplemental Table 2. Characteristics between the patients categorized by week-1 level of absolute lymphocyte count in the primary cohort and IPTW cohort**

|                                               | Before IPTW      |                  |         | After IPTW       |                  |         |
|-----------------------------------------------|------------------|------------------|---------|------------------|------------------|---------|
|                                               | ALC $\geq$ 1500  | ALC< 1500        | p value | ALC $\geq$ 1500  | ALC< 1500        | p value |
| <b>Basic characteristics</b>                  |                  |                  |         |                  |                  |         |
| Age, years                                    | 68 [56–79]       | 70 [59–81]       | <0.01   | 70 [58–81]       | 70 [59–81]       | 0.92    |
| Sex (male)                                    | 3033 (63.2%)     | 600 (64.8%)      | 0.39    | 605 (64.8%)      | 600 (64.8%)      | 0.99    |
| Body mass index                               | 23.4 [20.6–      | 22.1 [19.8–25.1] | <0.01   | 22.0 [19.6–25.3] | 22.0 [19.8–25.1] | 0.65    |
| CCI $\geq$ 2                                  | 3108 (64.8%)     | 652 (70.4%)      | <0.01   | 664 (71.1%)      | 652 (70.4%)      | 0.70    |
| <b>Severity and managements</b>               |                  |                  |         |                  |                  |         |
| APACHE II                                     | 24 [19–30]       | 27 [21–31]       | <0.01   | 26 [21–31]       | 27 [21–31]       | 1.00    |
| Presence of septic shock                      | 774 (16.1%)      | 212 (22.9%)      | <0.01   | 217 (23.2%)      | 212 (22.9%)      | 0.85    |
| Receiving mechanical ventilation              | 3500 (73.0%)     | 734 (79.3%)      | <0.01   | 745 (79.8%)      | 734 (79.3%)      | 0.70    |
| Fluid balance day 1-3, positive               | 3012 (62.8%)     | 672 (72.6%)      | <0.01   | 680 (72.8%)      | 672 (72.6%)      | 0.89    |
| Blood transfusion in ICU                      | 2347 (48.9%)     | 597 (64.5%)      | <0.01   | 609 (65.2%)      | 597 (64.5%)      | 0.68    |
| <b>Main organ dysfunction/failure</b>         |                  |                  |         |                  |                  |         |
| Acute respiratory failure                     | 1382 (28.8%)     | 217 (23.4%)      | <0.01   | 215 (23.1%)      | 217 (23.4%)      | 0.82    |
| Acute neurological disorders                  | 514 (10.7%)      | 30 (3.2%)        | <0.01   | 30 (3.2%)        | 30 (3.2%)        | 0.91    |
| Acute cardiac disorders                       | 436 (9.1%)       | 64 (6.9%)        | 0.04    | 64 (6.8%)        | 64 (6.9%)        | 0.93    |
| Acute renal disorders                         | 190 (4.0%)       | 29 (3.1%)        | 0.27    | 29 (3.1%)        | 29 (3.1%)        | 0.92    |
| <b>Laboratory data</b>                        |                  |                  |         |                  |                  |         |
| White blood cell count ( $10^3/\mu\text{L}$ ) | 13.6 [10.5–16.7] | 12.0 [8.7–15.2]  | <0.01   | 12.0 [8.9–15.1]  | 12.0 [8.7–15.2]  | 0.73    |
| Albumin(g/dl)                                 | 3.1 [2.7–3.6]    | 2.9 [2.5–3.4]    | <0.01   | 3.0 [2.5–3.4]    | 3.0 [2.5–3.4]    | 0.51    |
| Platelet ( $10^3/\mu\text{L}$ )               | 251 [205–305]    | 238 [193–293]    | <0.01   | 235 [194–290]    | 238 [193–293]    | 0.85    |
| Haemoglobin (g/dL)                            | 12.7 [11.3–14.2] | 12.3 [11.0–13.6] | <0.01   | 12.0 [10.9–13.6] | 12.0 [11.0–13.6] | 0.76    |
| Lactate (mg/dL)                               | 15.1 [11.3–19.4] | 15.6 [11.5–20.1] | 0.04    | 16.0 [11.7–19.7] | 16.0 [11.5–20.1] | 0.87    |
| Creatinine (mg/dL)                            | 1.1 [0.8–1.4]    | 1.1 [0.8–1.4]    | 0.80    | 1.0 [0.8–1.4]    | 1.0 [0.8–1.4]    | 0.92    |

Abbreviations: IPTW, inverse probability of treatment weighting; CCI, Charlson Comorbidity Index; APACHE, acute physiology and chronic health evaluation.

**Supplemental Table 3. Characteristics between the patients categorized by week-1 level of absolute lymphocyte count in the primary cohort and propensity score-matched cohort**

|                                               | Before PSM                 |                    | p value | 1:1 PSM                  |                    | p value |
|-----------------------------------------------|----------------------------|--------------------|---------|--------------------------|--------------------|---------|
|                                               | ALC $\geq$ 1000<br>n=4,796 | ALC< 1000<br>n=926 |         | ALC $\geq$ 1000<br>n=926 | ALC< 1000<br>n=926 |         |
| <b>Basic characteristics</b>                  |                            |                    |         |                          |                    |         |
| Age, years                                    | 68 [56–79]                 | 70 [59–81]         | <0.01   | 70 [58–81]               | 70 [59–81]         | 0.92    |
| Sex (male)                                    | 3033 (63.2%)               | 600 (64.8%)        | 0.39    | 605 (64.8%)              | 600 (64.8%)        | 0.99    |
| Body mass index                               | 23.4 [20.6–                | 22.1 [19.8–25.1]   | <0.01   | 22.0 [19.6–25.3]         | 22.0 [19.8–25.1]   | 0.65    |
| CCI $\geq$ 2                                  | 3108 (64.8%)               | 652 (70.4%)        | <0.01   | 664 (71.1%)              | 652 (70.4%)        | 0.70    |
| <b>Severity and managements</b>               |                            |                    |         |                          |                    |         |
| APACHE II                                     | 24 [19–30]                 | 27 [21–31]         | <0.01   | 26 [21–31]               | 27 [21–31]         | 1.00    |
| Presence of septic shock                      | 774 (16.1%)                | 212 (22.9%)        | <0.01   | 217 (23.2%)              | 212 (22.9%)        | 0.85    |
| Receiving mechanical ventilation              | 3500 (73.0%)               | 734 (79.3%)        | <0.01   | 745 (79.8%)              | 734 (79.3%)        | 0.70    |
| Fluid balance day 1-3, positive               | 3012 (62.8%)               | 672 (72.6%)        | <0.01   | 680 (72.8%)              | 672 (72.6%)        | 0.89    |
| Blood transfusion in ICU                      | 2347 (48.9%)               | 597 (64.5%)        | <0.01   | 609 (65.2%)              | 597 (64.5%)        | 0.68    |
| <b>Main organ dysfunction/failure</b>         |                            |                    |         |                          |                    |         |
| Acute respiratory failure                     | 1382 (28.8%)               | 217 (23.4%)        | <0.01   | 215 (23.1%)              | 217 (23.4%)        | 0.82    |
| Acute neurological disorders                  | 514 (10.7%)                | 30 (3.2%)          | <0.01   | 30 (3.2%)                | 30 (3.2%)          | 0.91    |
| Acute cardiac disorders                       | 436 (9.1%)                 | 64 (6.9%)          | 0.04    | 64 (6.8%)                | 64 (6.9%)          | 0.93    |
| Acute renal disorders                         | 190 (4.0%)                 | 29 (3.1%)          | 0.27    | 29 (3.1%)                | 29 (3.1%)          | 0.92    |
| <b>Laboratory data</b>                        |                            |                    |         |                          |                    |         |
| White blood cell count ( $10^3/\mu\text{L}$ ) | 13.6 [10.5–16.7]           | 12.0 [8.7–15.2]    | <0.01   | 12.0 [8.9–15.1]          | 12.0 [8.7–15.2]    | 0.73    |
| Albumin(g/dl)                                 | 3.1 [2.7–3.6]              | 2.9 [2.5–3.4]      | <0.01   | 3.0 [2.5–3.4]            | 3.0 [2.5–3.4]      | 0.51    |
| Platelet ( $10^3/\mu\text{L}$ )               | 251 [205–305]              | 238 [193–293]      | <0.01   | 235 [194–290]            | 238 [193–293]      | 0.85    |
| Haemoglobin (g/dL)                            | 12.7 [11.3–14.2]           | 12.3 [11.0–13.6]   | <0.01   | 12.0 [10.9–13.6]         | 12.0 [11.0–13.6]   | 0.76    |
| Lactate (mg/dL)                               | 15.1 [11.3–19.4]           | 15.6 [11.5–20.1]   | 0.04    | 16.0 [11.7–19.7]         | 16.0 [11.5–20.1]   | 0.87    |
| Creatinine (mg/dL)                            | 1.1 [0.8–1.4]              | 1.1 [0.8–1.4]      | 0.80    | 1.0 [0.8–1.4]            | 1.0 [0.8–1.4]      | 0.92    |

Abbreviations: PSM, propensity score matching; CCI, Charlson Comorbidity Index; APACHE, acute physiology and chronic health evaluation.

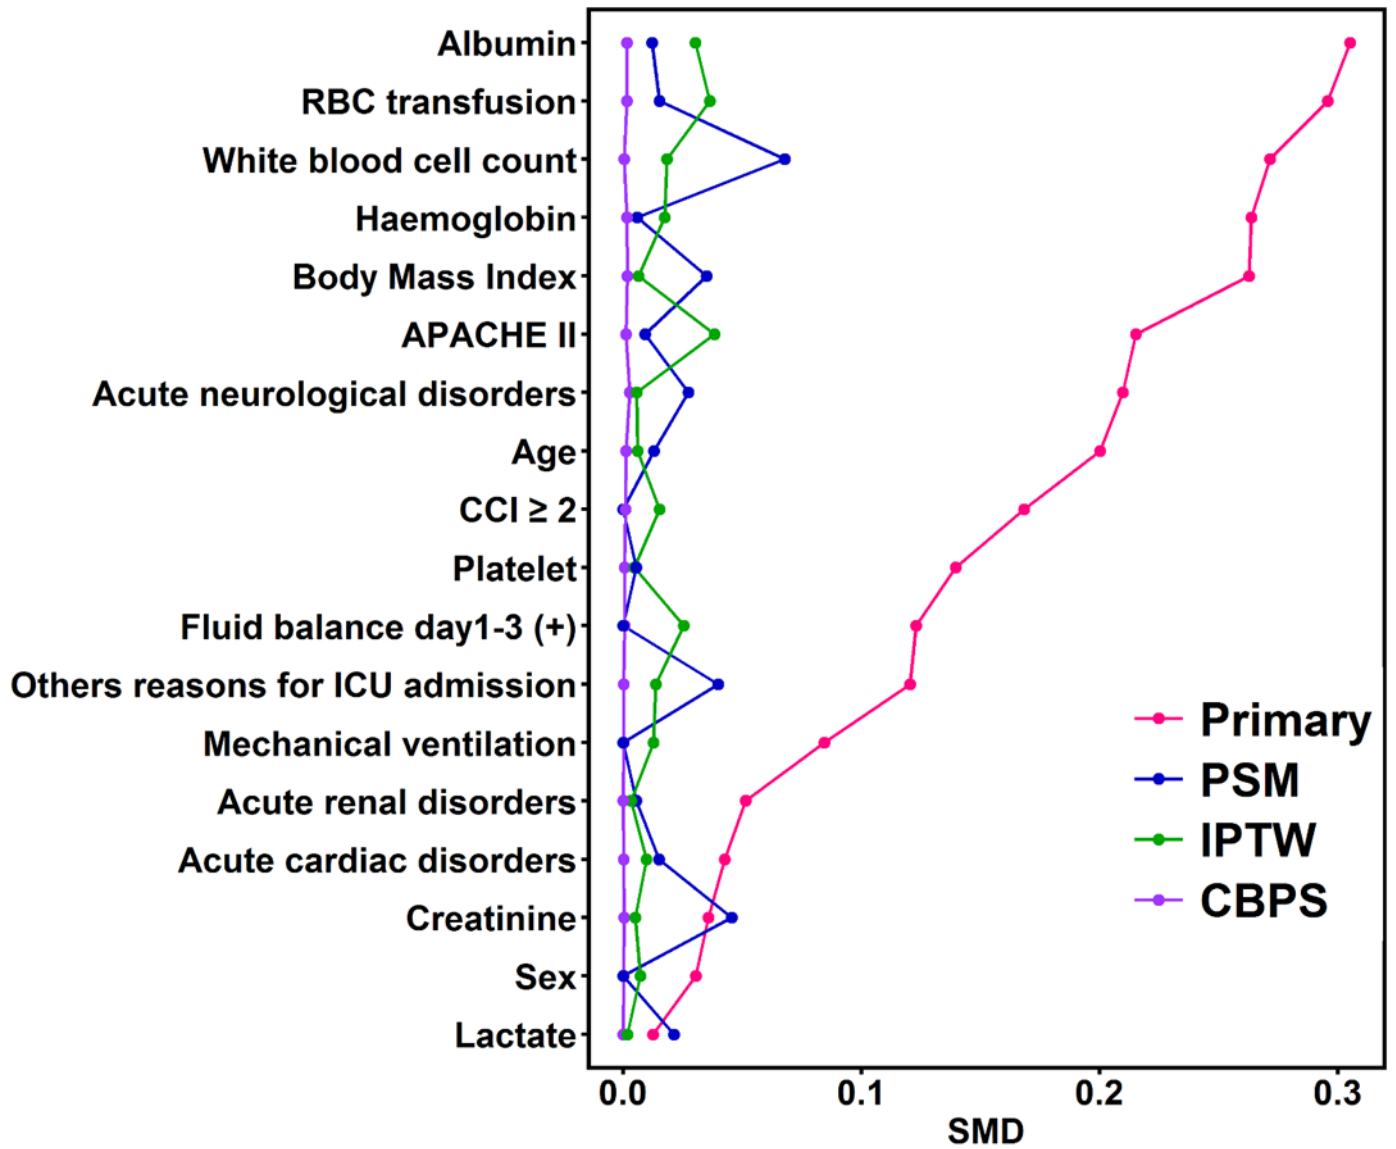

**Supplemental Figure 1. The standardized mean difference between the patients whose absolute lymphocyte counts were higher and lower than 1500 per  $\mu\text{L}$  in each cohort. Variables were ranked by the SMD. Abbreviations: SMD, standard mean difference; PSM, propensity score matching; IPTW, inverse probability of treatment weighting; CBPS, covariate balancing propensity score; APACHE, acute physiology and chronic health evaluation; BUN, blood urea nitrogen; BMI, body mass index; COPD, chronic obstructive pulmonary disease.**
